# Supplementary material for: Influence of Auricularia cornea Polysaccharide Coating on the Stability and Antioxidant Activity of Liposomes Ginsenoside Rh2
Source: MDPI journal article supplement (doi:10.3390/foods12213946), 2023-10-29
Supplement: s1 [file s1]

# Supplementary tables:

Table.S1. Response surface design factors and levels.

| Level | Factor |      |    |    |
|-------|--------|------|----|----|
|       | A      | B    | C  | D  |
| -1    | 2:1    | 1:10 | 40 | 30 |
| 0     | 1:1    | 1:15 | 50 | 40 |
| 1     | 1:2    | 1:20 | 60 | 50 |

Table.S2. Experimental design and response value results.

| Test No. | Factor                 |                        |                         |                    | response |
|----------|------------------------|------------------------|-------------------------|--------------------|----------|
|          | Film to material ratio | Rh2: Soy lecithin(w:w) | Hydrate temperature(°C) | Hydrate time (min) | EE (%)   |
| 1        | 1:1                    | 1:15                   | 50                      | 40                 | 88.47    |
| 2        | 1:2                    | 1:10                   | 50                      | 40                 | 87.94    |
| 3        | 1:2                    | 1:15                   | 50                      | 30                 | 87.74    |
| 4        | 1:1                    | 1:10                   | 60                      | 40                 | 87.53    |
| 5        | 1:1                    | 1:20                   | 50                      | 40                 | 89.99    |
| 6        | 1:1                    | 1:20                   | 60                      | 30                 | 87.17    |
| 7        | 2:1                    | 1:10                   | 50                      | 40                 | 87.46    |
| 8        | 1:1                    | 1:10                   | 40                      | 30                 | 86.42    |
| 9        | 1:1                    | 1:20                   | 50                      | 40                 | 88.92    |
| 10       | 1:2                    | 1:20                   | 50                      | 50                 | 87.96    |
| 11       | 1:1                    | 1:20                   | 40                      | 30                 | 86.92    |
| 12       | 2:1                    | 1:20                   | 50                      | 30                 | 86.82    |
| 13       | 1:1                    | 1:20                   | 40                      | 30                 | 86.96    |
| 14       | 1:1                    | 1:20                   | 50                      | 40                 | 89.74    |
| 15       | 1:1                    | 1:15                   | 40                      | 40                 | 87.36    |
| 16       | 1:2                    | 1:20                   | 60                      | 40                 | 87.26    |

|    |     |      |    |    |       |
|----|-----|------|----|----|-------|
| 17 | 2:1 | 1:20 | 50 | 50 | 88.38 |
| 18 | 1:1 | 1:15 | 50 | 30 | 87.37 |
| 19 | 1:1 | 1:15 | 50 | 50 | 87.09 |
| 20 | 2:1 | 1:20 | 40 | 40 | 87.28 |
| 21 | 1:2 | 1:20 | 40 | 40 | 87.95 |
| 22 | 2:1 | 1:15 | 50 | 40 | 87.6  |
| 23 | 2:1 | 1:20 | 60 | 40 | 86.91 |
| 24 | 1:1 | 1:20 | 50 | 40 | 89.89 |
| 25 | 1:1 | 1:20 | 50 | 40 | 89.09 |
| 26 | 1:1 | 1:10 | 40 | 40 | 87.47 |
| 27 | 1:1 | 1:10 | 50 | 50 | 87.56 |
| 28 | 1:1 | 1:20 | 60 | 50 | 87.93 |
| 29 | 1:2 | 1:15 | 50 | 40 | 88.62 |

Table.S3. Variance analysis of quadratic polynomial model.

| Source                   | Sum of squares | df | Mean square | F value | P value  |
|--------------------------|----------------|----|-------------|---------|----------|
| Model                    | 21.98          | 14 | 1.57        | 8.15    | 0.0002   |
| A-Film to material ratio | 0.7459         | 1  | 0.7459      | 3.87    | 0.0692   |
| B-Rh2: Soy lecithin      | 0.1042         | 1  | 0.1042      | 0.541   | 0.4742   |
| C-Hydrate temperature    | 0.0064         | 1  | 0.0064      | 0.0331  | 0.8583   |
| D-Hydrate time           | 0.6696         | 1  | 0.6696      | 3.48    | 0.0833   |
| AB                       | 0.0584         | 1  | 0.0584      | 0.3031  | 0.5906   |
| AC                       | 0.0256         | 1  | 0.0256      | 0.1329  | 0.7209   |
| AD                       | 0.4489         | 1  | 0.4489      | 2.33    | 0.1491   |
| BC                       | 0.0124         | 1  | 0.0124      | 0.0646  | 0.8031   |
| BD                       | 0.0173         | 1  | 0.0173      | 0.09    | 0.7685   |
| CD                       | 0.0202         | 1  | 0.0202      | 0.1048  | 0.7509   |
| A2                       | 3.84           | 1  | 3.84        | 19.96   | 0.0005   |
| B2                       | 5.35           | 1  | 5.35        | 27.76   | 0.0001   |
| C2                       | 7.35           | 1  | 7.35        | 38.14   | < 0.0001 |

|             |        |    |        |       |          |
|-------------|--------|----|--------|-------|----------|
| D2          | 6.46   | 1  | 6.46   | 33.52 | < 0.0001 |
| Residual    | 2.7    | 14 | 0.1926 |       |          |
| Lack of Fit | 1.74   | 9  | 0.1939 |       |          |
| Pure Error  | 0.9517 | 5  | 0.1903 |       |          |
| The sum     | 24.68  | 28 |        |       |          |

---
